# Supplementary material
Source: Elsevier journal article supplement (https://psychoanalysisandsocialjustice.com/wp-content/uploads/2025/08/mmc1.pdf)
Supplement: mmc1 [file mmc1.pdf]

# THE LANCET

## **Supplementary appendix**

This appendix formed part of the original submission. We post it as supplied by the authors.

Supplement to: De Vogli R, Montomoli J, Abu-Sittah G, Pappé I. Break the selective silence on the genocide in Gaza. *Lancet* 2025; published online July 30. [https://doi.org/10.1016/S0140-6736\(25\)01541-7](https://doi.org/10.1016/S0140-6736(25)01541-7).

### **Supplementary Materials**

Lancet Correspondence (“Break the selective silence on the genocide in Gaza”)

### **Appendix for Additional References**

**Open Letter “Stop the Silence: Stop the Silence! Academic Associations Must Recognise the Genocide in Gaza”**

## Appendix for Additional References<sup>1</sup>

On the silence of academic associations and some of their official statements of the American Public Health Association (APHA) and European Public Health Association (EUPHA):

Abbas, S., & Mitchell, L. (2024). Australian medical leadership's silence on Gaza is a moral failure. *The Lancet*, 403(10432), 1138–1139.  
[https://doi.org/10.1016/S0140-6736\(24\)00401-X](https://doi.org/10.1016/S0140-6736(24)00401-X)

Niu H, Bedggood M, Jenkins M, Pathan S, Saeed D, Jureidini J. Genocide in Gaza: moral and ethical failures of medical institutions. *Lancet* 2025;403(10424):383.  
[https://www.thelancet.com/journals/lancet/article/PIIS0140-6736\(25\)01173-0/fulltext](https://www.thelancet.com/journals/lancet/article/PIIS0140-6736(25)01173-0/fulltext)

American Public Health Association. Statement on the Israel-Hamas War. January 2025.  
<https://www.apha.org/news-and-media/news-releases/apha-news-releases/2025/israel-hamas-ceasefire>

European Public Health Association (EUPHA). *Statement on the Gaza conflict and its impact on public health*. Nov 2024 (before being updated on July 18, 2025)  
[https://eupha.org/repository/advocacy/2024/Gaza%20conflict%20statement\\_signed.pdf](https://eupha.org/repository/advocacy/2024/Gaza%20conflict%20statement_signed.pdf)

Australian Medical Association. (2024, April 24). *AMA statement on the conflict in Israel and Gaza*. Australian Medical Association. <https://www.ama.com.au/articles/ama-statement-conflict-israel-and-gaza>

Last year, some protesters defined what they termed "thought repression adopted by APHA leadership". For more details, read: 'Opposing Genocide at the American Public Health Association Convention 2024'  
[https://countercurrents.org/2024/11/opposing-genocide-at-the-american-public-health-association-convention-2024/?fbclid=IwZXh0bgNhZW0CMTAAYnJpZBEwYXB2Q0dqbKxleURWVVR2NgEeLavL2aBd2kn3daj5J-MI8bbMly-iZI-PwqmNCggPb-vRqo7jGIYLCBZ5UYE\\_aem\\_dBY7uKhH0J-xSPh1bwY4HA](https://countercurrents.org/2024/11/opposing-genocide-at-the-american-public-health-association-convention-2024/?fbclid=IwZXh0bgNhZW0CMTAAYnJpZBEwYXB2Q0dqbKxleURWVVR2NgEeLavL2aBd2kn3daj5J-MI8bbMly-iZI-PwqmNCggPb-vRqo7jGIYLCBZ5UYE_aem_dBY7uKhH0J-xSPh1bwY4HA)

On academic associations that have made explicit reference to genocide:

International Sociological Association. SA Solidarity Statement with the Palestinian People  
SA Solidarity Statement with the Palestinian People  
<https://www.isa-sociology.org/en/about-isa/isa-human-rights-committee/isa-solidarity-statement-with-the-palestinian-people>

The Middle East section of the American Anthropological Association (AAA),  
<https://mes.americananthro.org/2024/06/14/aaa-sections-statement-on-gaza-palestine-june-2024/>

---

<sup>1</sup> Most references come from a literature review conducted for the following publication: De Vogli R. *Selective Empathy: The West Through the Gaze of Gaza*. Forthcoming 2025. Berlin: De Gruyter; Leiden: Brill. (Studies in Critical Sociology Book Series)  
<https://brill.com/display/title/73467>

### On estimates of child deaths, trauma and child amputees in Gaza

According to UNRWA, 17,121\* children have died in Gaza from October 7, 2023, to July 9, 2025, compared to 521\*\* children killed over more than two years of Russian invasion in Ukraine. from February 24 to 2022 to December 31, 2024 (OHCHR).

\*<https://www.unrwa.org/resources/reports/unrwa-situation-report-179-situation-gaza-strip-and-west-bank-including-east-jerusalem>

\*\* <https://www.ohchr.org/en/press-releases/2025/03/ukraine-devastating-impact-hostilities-childrens-rights>

World Health Organization. Estimating Trauma Rehabilitation Needs in Gaza using Injury Data from Emergency Medical Teams. 2024

<https://www.emro.who.int/images/stories/palestine/Rehab-injury-estimate-Gaza.pdf?ua=1>

War Child. War Child shares first study of psychological impact of war on vulnerable children in Gaza. Dec 11, 2024. (accessed July 11, 2025).

<https://www.warchild.org.uk/news/war-child-shares-first-study-psychological-impact-war-vulnerable-children-gaza>

### On top human rights organizations agreeing there is a genocide in Gaza

Amnesty International and Human Rights Watch, B'Tselem, along with the Lemkin Institute for the Prevention of Genocide, Doctors Without Borders, the University Network for Human Rights and UN special rapporteurs, Francesca Albanese, Michael Fakhri, Taleng Mofokeng also officially recognised the genocide in Gaza.

B'Tselem; Physicians for Human Rights-Israel. Our Genocide. Jerusalem: B'Tselem; 28 July 2025.

[https://www.btselem.org/publications/202507\\_our\\_genocide](https://www.btselem.org/publications/202507_our_genocide)

Human Rights Watch. (2024, December 19). Israel's Crime of Extermination, Acts of Genocide in Gaza. <https://www.hrw.org/news/2024/12/19/israels-crime-extermiation-acts-genocide-gaza>

Doctors Without Borders. (2024, December 19). *MSF report exposes Israel's campaign of total destruction*. <https://www.msf.org/msf-report-exposes-israel%E2%80%99s-campaign-total-destruction>

Lemkin Institute. (2025, May 28). *Statement Calling Out US & Israeli Propaganda*. Lemkin Institute for Genocide Prevention. [https://www.lemkininstitute.com/statements-new-page/statement-calling-out-us-%26-israeli-propaganda-?utm\\_source=chatgpt.com](https://www.lemkininstitute.com/statements-new-page/statement-calling-out-us-%26-israeli-propaganda-?utm_source=chatgpt.com)

ICJ. (2024). Application of the Convention on the Prevention and Punishment of the Crime of Genocide in the Gaza Strip (South Africa v. Israel), Provisional Measures, Order of 26 January 2024. International Court of Justice. <https://www.icj-cij.org/sites/default/files/case-related/192/192-20240126-ord-01-00-en.pdf>

UN Human Rights Council. (2024, July 1). Anatomy of a Genocide—Report of the Special Rapporteur on the situation of human rights in the Palestinian territory occupied since 1967 to Human Rights Council. *Question of Palestine*. <https://docs.un.org/en/A/HRC/55/73>

Doctors Without Borders. (2025, January 7). *Strikes raids and incursions year of relentless attacks on healthcare in Palestine*. <https://www.msf.org/strikes-raids-and-incursions-year-relentless-attacks-healthcare-palestine>

On genocide scholars agreeing there is a genocide in Gaza

Genocide scholars: Raz Segal, Martin Shaw, Melanie O'Brien, John Quigley, Dirk Moses, Omer Bartov, Amos Goldberg, Yair Mordechai, Gregory Stanton, Maung Zarni, Abdelwahab El-Affendi, Damien Shortt, Nimer Sultany, Zoé Samudzi, Omar Shahabudin McDoom, and Mark Levene.

McDoom, O. S. (2024). Expert Commentary, the Israeli-Palestinian Conflict, and the Question of Genocide: Prosemitic Bias within a Scholarly Community? *Journal of Genocide Research*, 0(0), 1–9. <https://doi.org/10.1080/14623528.2024.2346403>

Bartov, O. (2024, August 13). As a former IDF soldier and historian of genocide, I was deeply disturbed by my recent visit to Israel. *The Guardian*. <https://www.theguardian.com/world/article/2024/aug/13/israel-gaza-historian-omer-bartov>

Conley, J. (2025, May 15). Even Once Reluctant Scholars Now Agree on Israel's Gaza Assault: It's a Genocide | Common Dreams. <https://www.commondreams.org/news/israel-is-committing-genocide-in-gaza>

Cohen, M. (2024, December 19). *Can Genocide Studies Survive a Genocide in Gaza?* Jewish Currents. <https://jewishcurrents.org/can-genocide-studies-survive-a-genocide-in-gaza>

Prosinger, J. (2024, November 29). Human Rights Expert: 'A Strong Case that Israel's Response Constitutes the Crime of Genocide'. *Der Spiegel*. <https://www.spiegel.de/international/world/interview-with-human-rights-expert-william-schabas-a-strong-case-that-israels-response-constitutes-the-crime-of-genocide-a-da7e4524-ab3b-40e4-b409-f8fca9c081b8>

Quigley, J. B. (2024, March 14). Legal Standard for Genocide Intent: An Uphill Climb for Israel in Gaza Suit. *EJIL: Talk!* <https://www.ejiltalk.org/legal-standard-for-genocide-intent-an-uphill-climb-for-israel-in-gaza-suit/>

Sah, S., & Dawas, K. (2024). *Israel is using starvation as a weapon of war in Gaza*. <https://doi.org/10.1136/bmj.q1018>

Samudzi, Z. (2024). "We are Fighting Nazis": Genocidal Fashionings of Gaza(ns) After 7 October. *Journal of Genocide Research*, 0(0), 1–9. <https://doi.org/10.1080/14623528.2024.2305524>

Sarfraz, H. (2024, June 4). *Genocide in plain sight*. Tribune The Express. <https://www.genocidewatch.com/single-post/genocide-in-plain-sight>

Shaw, M. (2024). Inescapably Genocidal. *Journal of Genocide Research*, 0(0), 1–5. <https://doi.org/10.1080/14623528.2023.2300555>

Smith, J., Shellah, D., & Samudzi, Z. (2025). On the quantification of military violence in Gaza. *The Lancet*, 405(10477), 440–442. [https://doi.org/10.1016/S0140-6736\(25\)00138-2](https://doi.org/10.1016/S0140-6736(25)00138-2)

Sondos, A. (2025, June 5). *Israel committing genocide in Gaza, says top legal scholar Melanie O'Brien*. Middle East Eye. <https://www.middleeasteye.net/news/israel-committing-genocide-gaza-says-top-legal-scholar-melanie-obrien>

Sultany, N. (2024). A Threshold Crossed: On Genocidal Intent and the Duty to Prevent Genocide in Palestine. *Journal of Genocide Research*, 1–26. <https://doi.org/10.1080/14623528.2024.2351261>

TWAILR. (2023, October 17). *Public Statement: Scholars Warn of Potential Genocide in Gaza*. Third World Approaches to International Law Review. <https://twailr.com/public-statement-scholars-warn-of-potential-genocide-in-gaza/>

El-Affendi, A. (2024). The Futility of Genocide Studies After Gaza. *Journal of Genocide Research*, 0(0), 1–7.

Goldberg, A. (2024, April 18). Yes, it is genocide. *The Palestine Project*. <https://thepalestineproject.medium.com/yes-it-is-genocide-634a07ea27d4>

Kartal, A. G. (2024, April 26). *What we are seeing in Gaza is a 'repeat of Auschwitz,' says genocide expert*. <https://www.aa.com.tr/en/middle-east/what-we-are-seeing-in-gaza-is-a-repeat-of-auschwitz-says-genocide-expert/3202869>

Levene, M. (2024). Gaza 2023: Words Matter, Lives Matter More. *Journal of Genocide Research*, 0(0), 1–7. <https://doi.org/10.1080/14623528.2024.2301866>

Middle East Monitor. (2024, March 8). *UN rights expert: 'Israel's starvation of Gaza is genocide'*. [https://www.middleeastmonitor.com/20240308-un-rights-expert-israels-starvation-of-gaza-is-genocide/?fbclid=IwZXh0bgNhZW0CMdTAAAR4rbhP\\_ObmUzDw5KmlyICOfyHDWDFk0TmAKmwQ07IsbgacgBdE2ZkXfrGBGxQ\\_aem\\_wVQsgq-lv2TP6BrcvJXLPA](https://www.middleeastmonitor.com/20240308-un-rights-expert-israels-starvation-of-gaza-is-genocide/?fbclid=IwZXh0bgNhZW0CMdTAAAR4rbhP_ObmUzDw5KmlyICOfyHDWDFk0TmAKmwQ07IsbgacgBdE2ZkXfrGBGxQ_aem_wVQsgq-lv2TP6BrcvJXLPA)

Mordechai, L. (2024). *Bearing Witness to the Israel-Gaza War*. [https://www.academia.edu/112967602/Bearing\\_Witness\\_to\\_the\\_Israel\\_Gaza\\_War\\_updated\\_to\\_15\\_April\\_2024](https://www.academia.edu/112967602/Bearing_Witness_to_the_Israel_Gaza_War_updated_to_15_April_2024)

#### Articles on the genocide and use of starvation as weapon in Gaza

Salmiya, M. A. (2024). Stop the Gaza genocide immediately. *The Lancet*, 403(10441), 2286–2287. [https://doi.org/10.1016/S0140-6736\(24\)00135-1](https://doi.org/10.1016/S0140-6736(24)00135-1)

Faddoul, A., Shannon, G., Asghar, K., Boukari, Y., Smith, J., & Neilson, A. (2024). The health dimensions of violence in Palestine: A call to prevent genocide. *Lancet (London, England)*, 403(10421), 25–26. [https://doi.org/10.1016/S0140-6736\(23\)02751-4](https://doi.org/10.1016/S0140-6736(23)02751-4)

Niu H, Bedggood M, Jenkins M, Pathan S, Saeed D & Jureidini J. Genocide in Gaza: moral and ethical failures of medical institutions. *Lancet*. 2025;403(10424):383.

Sah S Israel is using starvation as a weapon of war in Gaza. *BMJ* 2024; 385 <https://www.bmj.com/content/385/bmj.q1018>

#### Extra references used to write the open letter

United Nations Human Rights Office of the High Commissioner. Israel's escalating use of torture against Palestinians in custody a preventable crime against humanity: UN experts. Aug 5, 2024. (Accessed July 11, 2025). <https://www.ohchr.org/en/press-releases/2024/08/israels-escalating-use-torture-against-palestinians-custody-preventable>

Jamaluddine Z, Abukmail H, Aly S, Campbell OMR, Checchi F. Traumatic injury mortality in the Gaza Strip from Oct 7, 2023, to June 30, 2024: a capture-recapture analysis. *Lancet* 2025;405(10477):469–77. [https://www.thelancet.com/journals/lancet/article/PIIS0140-6736\(24\)02678-3/fulltext](https://www.thelancet.com/journals/lancet/article/PIIS0140-6736(24)02678-3/fulltext)

United Nations Office for the Coordination of Humanitarian Affairs. Reported impact snapshot, Gaza Strip. May 7, 2025. Reported Casualties (Cumulative) as of 7 May, 2025. (Accessed July 11, 2025). <https://www.ochaopt.org/content/reported-impact-snapshot-gaza-strip-7-may-2025>

United Nations Human Rights Office of the High Commissioner. Report of the Independent International Commission of Inquiry on the Occupied Palestinian Territory, including East Jerusalem, and Israel. May 6, 2025. (accessed July 11, 2025). <https://www.ohchr.org/en/press-releases/2025/06/israeli-attacks-educational-religious-and-cultural-sites-occupied>

Ayoub, H. H., Chemaitelly, H., & Abu-Raddad, L. J. (2024). Comparative analysis and evolution of civilian versus combatant mortality ratios in Israel-Gaza conflicts, 2008–2023. *Frontiers in Public Health*, 12. <https://doi.org/10.3389/fpubh.2024.1359189>

Doctors Without Borders. (2024c, December 19). *MSF report exposes Israel's campaign of total destruction*. <https://www.msf.org/msf-report-exposes-israel%E2%80%99s-campaign-total-destruction>

Doctors Without Borders. (2025, January 7). *Strikes raids and incursions year of relentless attacks on healthcare in Palestine*. <https://www.msf.org/strikes-raids-and-incursions-year-relentless-attacks-healthcare-palestine>

## **Open Letter “Stop the Silence: Stop the Silence! Academic Associations Must Recognise the Genocide in Gaza”**

To the attention of:

European Public Health Association (EUPHA), American Public Health Association (APHA), World Medical Association (WMA), American Medical Association (AMA), European Federation of Psychologists' Associations (EFPA), American Psychological Association (APA), International Society of Political Psychology (ISPP), European Health Psychology Society (EHPS), International Political Science Association (IPSA), American Political Science Association (APSA), American Economic Association (AEA), European Economic Association (EEA), American Association for the Advancement of Science (AAAS), International Association of Universities (IAU), American Anthropological Association (AAA), American Sociological Association (ASA), European Sociological Association (ESA), International Society for Criminology (ISC), British Society of Criminology (BSC), European Consortium for Political Research (ECPR), and other relevant professional and academic associations

Esteemed colleagues,

As academics, scholars, and professionals from various disciplines, including public health, medicine, history, sociology, criminology, genocide research, economics, political sciences, international relations and psychology, alongside activists and members of global civil society, we write to express our profound concern over the ongoing genocide, public health crisis and systemic destruction in Gaza.

We are alarmed by the international community's failure to respond adequately to this humanitarian emergency.

We note with dismay that some associations have either remained silent or issued statements that fall short of moral and professional responsibility in the face of overwhelming evidence and widespread recognition of genocide.

We recognise that a small number of associations have taken important steps by passing resolutions in support of a ceasefire and academic freedom. We commend these efforts. However, we also note with concern that such statements have avoided the use of the term “genocide”, and that apart from some exceptions (e.g., the International Sociological Association and the Middle East section of the American Anthropological Association), these statements fail to clearly indicate responsibility for the mass atrocities, nor do they call for international legal accountability.

Neutrality in the face of genocide is complicity. We call on associations to recognize and respond to the health, psychological, social, economic, and structural collapse occurring in Gaza. Among the most devastating facts are:

### **1. A historical mortality crisis and an unprecedented collapse in life expectancy in recent times**

According to a Lancet paper, Gaza suffered the fastest reduction in life expectancy ever recorded in a single year. The average life expectancy at birth declined by around 35 years in



2024, falling from 75.5 to just 40.5 years. If confirmed, this would be without recent historical precedent, even during the Rwandan genocide of 1994. (Guillot et al., 2025; Our World in Data). Another Lancet study showed that the age and gender distribution of mortality in Gaza revealed a lack of discrimination in killings across age and gender. This pattern is similar to that observed by the UN Inter-Agency Group for Child Mortality Estimation during the Rwandan genocide of 1994. (Jamaluddine et al., 2025).

## **2. Unprecedented massacres, amputations and psychological trauma affecting children in recent times**

There is a unique public health catastrophe affecting children in Gaza. As a BMJ article stated, 'While civilian casualties were significant in all cases studied, none has seen the number of civilian deaths, particularly among children, as in Gaza since last October' (Bhutta et al., 2024).

According to a public statement by the United Nations, Gaza has the highest number of child amputees per capita in the world. (UNOCHA, 2024c).

There is also a devastating mental health situation. This is reflected in the unprecedented level of psychological trauma. A study of children living through the conflict in Gaza found that 49% wanted to die, 96% believed their death was imminent, 79% had nightmares, and 73% showed signs of aggression (War Child, 2024)

## **3. Unprecedented devastation of health systems**

Since 8 October, the Gazan healthcare system has been the target of systematic attacks. According to the World Health Organization, the Israeli military carried out 720 attacks on healthcare targets in the Gaza Strip between October 2023 and May 2025. This includes 125 health facilities, 34 hospitals, and 186 ambulances. (WHO, 2025; UNOCHA, 2025c).

## **4. Mass killing of healthcare workers, UN personnel, and journalists**

Israel has caused the highest number of deaths among healthcare professionals, UN staff and journalists in any conflict zone in recent history. In 2024, Gaza experienced the highest number of UN staff mortality in UN history, with 126 members of staff being killed. (UN, 2025). Doctors Without Borders estimate that more than 1,400 healthcare workers have lost their life. (Doctors Without Borders, 2025). Since October 2023, at least 232 journalists and media workers have been killed in Gaza. A report documented that 'more journalists have been killed in Gaza than in the US Civil War, the World Wars, the Korean War, the Vietnam War, the wars in Yugoslavia, and the post-9/11 war in Afghanistan combined'. (Watson School of International and Public Affairs, 2025).

## **5. Scholasticide and Universitycide**

The United Nations has stated that Israel's assault has 'obliterated Gaza's educational system'. This has been characterised as 'scholasticide'. Between October 2023 and February 2025, around 71% (403 out of 564) of schools in Gaza were hit or damaged. At least 612 members of school staff were killed and 2,769 were injured. Furthermore, more than 57 university

buildings have been destroyed and over 190 university academic staff have been reported killed. (UN, 2025).

## **6. Use of starvation as weapon**

Israel has repeatedly and relentlessly used starvation as a weapon of war, as documented in numerous sources, including a British Medical Journal editorial (Sah & Dawas, 2024) and an article in The Lancet (Ashour et al., 2024).

## **7. Widespread infrastructure annihilation**

Approximately 81% of all buildings in Gaza have been damaged (UNOSAT, 2025). More than 50 million tons of rubble, much of it contaminated with unexploded bombs, now cover the territory. Experts estimate that it could take up to 20 years to clear the rubble (UNOCHA, 2025b).

## **8. Imprisonment without charge**

The dutiful and urgent advocacy for the release of the 50 Israeli hostages in Gaza must go hand in hand with the release of all Palestinians illegally detained in Israeli prisons. Although Western mainstream media often label them as “prisoners”, according to a July 2024 UN report, around a third of the 9,500 Palestinians imprisoned in Israel are detained without charge or trial (OHCHR, 2024).

## **9. Recognition of occupation and systematic violation of international law**

An occupying force that is responsible for repeated violations of international law has no “right to self-defence” outside its borders. As outlined in a document submitted to the International Court of Justice by the South African government, the events that have occurred since 7 October 2023 must be considered within 'the broader context of Israel's conduct towards the Palestinians during its 75 years of "apartheid", 56 years of "occupation" of Palestinian territory, and its 16 years of "blockade" of Gaza'. (ICJ, 2024)

## **10. Recognition of genocide**

A long and prestigious list of genocide scholars has affirmed that an ongoing genocide is taking place in Gaza: (Sondos, 2025; McDoom, 2024; Quigley, 2024; Moses, 2025; TWAILR, 2023; Goldberg, 2024; Prosinger, 2024; Mordechai, 2024; Kartal, 2024; Sarfraz, 2024; Bartov, 2024; Faddoul et al. 2024).

The most influential human rights organisations, including Amnesty International, Human Rights Watch and the Lemkin Institute for the Prevention of Genocide, as well as Doctors Without Borders, the University Network for Human Rights, and UN special rapporteurs Francesca Albanese, Michael Fakhri and Tlaleng Mofokeng, officially recognised the genocide in Gaza. (Lemkin Institute, 2025) (UN Human Rights Council, 2024) (United Nations, 2024) (OHCHR, 2025a) (Amnesty International, 2024) (Human Rights Watch, 2024) (Doctors Without Borders, 2024).

Given the health, psychological, social, and humanitarian catastrophe, we urge all professional and academic associations to:

- **Publicly recognise the genocide**
- Amend existing **official statements on Gaza** to reflect the full scope, gravity, and responsibility of the crisis
- **Call for immediate international intervention, including a permanent ceasefire, unrestricted humanitarian access, and legal accountability for war crimes, crimes against humanity and genocide**
- Defend **academic freedom** for those who research, teach, and advocate on Palestine
- Provide **direct support to displaced and targeted scholars, students, and healthcare professionals**
- Fund and promote **research into the public health, psychological, medical, socio-political, and economic consequences of the genocide in Gaza**

In times of atrocity, professional silence is not neutrality. It is endorsement and moral abdication.

We urge you to act with conscience, courage, and clarity.

This petition remains open to academics, professionals, and members of the public.

**Signatures** (they will be updated regularly and sent to each association listed above):

**IMPORTANT:** If you're a researcher, faculty member, or student affiliated with an academic institution, please register your affiliation in this google form here:

## **1. GOOGLE PAGE FOR COLLECTING SIGNATURES FROM RESEARCHERS, ACADEMICS AND PROFESSIONALS**

[https://docs.google.com/forms/d/e/1FAIpQLSdv805xY\\_0Kwt5zMw\\_y0JD7bLMU8Fe98saWGhgNP0PCZCIEsA/viewform](https://docs.google.com/forms/d/e/1FAIpQLSdv805xY_0Kwt5zMw_y0JD7bLMU8Fe98saWGhgNP0PCZCIEsA/viewform)

We have also created a page for collecting signatures among the general public:

## **2. CHANGE.ORG PAGE FOR COLLECTING SIGNATURES FROM THE GENERAL PUBLIC**

<https://www.change.org/p/stop-the-silence-academic-associations-must-recognise-the-genocide-in-gaza>

Thank you for standing with us.

*Updated on 21 July, 2025 ore 23:00*

1. Prof. Roberto De Vogli, MPH, PhD, Associate Professor, University of Padova, Italy, former Associate Professor, University of Michigan, University of California Davis, United States, and former Senior Lecturer, University College London, United Kingdom
2. Dr. Jonathan Montomoli, MD, PhD, Department of Anesthesia and Intensive Care, Rimini Hospital, Romagna Local Health Authority & Health Services Research, Evaluation and Policy Unit, Romagna Local Health Authority, Italy
3. Prof. Ghassan Abu-Sittah, MD, PhD, Rector and Associate Professor of Surgery, University of Glasgow, United Kingdom
4. Prof. Ilan Pappé, PhD, Professor of History, Director, European Centre for Palestine Studies, Co Director, Exeter Centre for Ethno Political Studies, University of Exeter, United Kingdom
5. Prof. Nassim Nicholas Taleb, PhD, Author & Retired Distinguished Professor, Tandon School of Engineering, New York University, United States, and former Maroun Semaan Faculty, University of Beirut, Lebanon
6. Prof. Rashid Khalidi, PhD, Edward Said Professor Emeritus of Modern Arab Studies, Department of History, Columbia University
7. Prof. Omer Bartov, PhD, Dean's Professor of Holocaust and Genocide Studies, Department of History, Faculty Fellow, Watson Institute for International & Public Affairs, Brown University
8. Prof. Avi Shlaim, MSc, Emeritus Fellow of St Antony's College and a former Professor of International Relations at the University of Oxford and Fellow of the British Academy, United Kingdom
9. Prof. Norman Finkelstein, PhD, PhD from Princeton University, Independent Scholar, Author, and former Professor of Political Science at DePaul University, United States
10. Prof. Martin Shaw, PhD, Professor Barcelona Institute of International Studies, Spain & Emeritus Professor, Sussex University, United Kingdom
11. Prof. Yanis Varoufakis, PhD, MeRA25 leader, DiEM25 co-founder, Professor of Economics, University of Athens, Honorary Professor of Political Economy, University of Sydney, Honoris Causa Professor of Law, Economics and Finance, The International University College of Torino, Distinguished Visiting Professor of Political Economy, Kings College, University of London
12. Prof. Richard Wilkinson, Emeritus Professor, University of Nottingham Medical School and Honorary Professor, University College London, United Kingdom
13. Prof. Kate Pickett, PhD, OBE FRSA FFPH FAcSS, Professor of Epidemiology & Director of the Born in Bradford Centre for Social Change, Associate Director, Leverhulme Centre for Anthropocene Biodiversity, Academic Director of Health Equity North, University of York, United Kingdom
14. Prof. Tomaso Montanari, PhD, Rector, University for Foreigners of Siena, Italy
15. Prof. Daniela Lucangeli, PhD, Professor of Psychology, University of Padova, Italy
16. Prof. Donatella Della Porta, Dr, Founding Dean of the Faculty of Political and Social Sciences, Director of the PhD program Political Science and Sociology & Director of Centre of Social Movements Studies, Scuola Normale Superiore in Florence, Italy
17. Prof. Nadera Shalhoub-Kevorkian, PhD, Chair in Global Law, Queen Mary University of London, Professor Extraordinarius, University of South Africa, Princeton University, Visiting Scholar and Harvard Divinity School- Visiting Scholar
18. Prof. Zahi Zalloua, PhD, Professor, Cushing Eells Professor of Philosophy and Literature & Director of Indigeneity, Race, and Ethnicity Studies, Whitman College, United States
19. Prof. Susan M. Akram, Clinical Professor and Director, International Human Rights Clinic, Boston University School of Law, Boston, United States
20. Dr. Samah Jabr, MD, Psychiatrist, Author, Lecturer & Human Rights Advocate, Former Head of Mental Health Unit, Palestinian Ministry of Health, Palestine
21. Dr. Jamie Stern-Weiner, PhD, University of Oxford, PhD, Books Editor, New York and London
22. Prof. Mariam Jamshidi, JD, MSc, Associate Professor of Law, University of Colorado Boulder, United States
23. Prof. Luigi Daniele, PhD, Associate Professor in International Law, University of Molise, Italy, Former Senior Lecturer, Nottingham Law School, United Kingdom
24. Prof. Micaela Frulli, PhD, Professor in International Law, Faculty of Law, University of Florence, Italy
25. Prof. Alfredo Saad Filho, PhD, Professor of International Political Economy, Queen's University Belfast, Northern Ireland
26. Prof. Graham Scambler, PhD, Emeritus Professor of Sociology, University College London, United Kingdom
27. Dr. Angelo Stefanini, MD MPH DTM&H, Researcher, University of Bologna (Retired), Italy

28. Dr. Francesca Bravi, MD, PhD, Director, General Directorate, Romagna Local Health Authority, Ravenna, Italy
29. Prof. Laura Dallolio, MD, PhD, Associate Professor, Department of Hygiene and Public Health, University of Bologna, Italy
30. Prof. Ivo Quaranta, PhD, Professor of Anthropology, University of Bologna, Italy
31. Prof. Anne Maass, PhD, Emeritus Professor, University of Padova, Italy
32. Prof. Paola Rivetti, PhD, Associate Professor, Dublin City University, Ireland
33. Prof. Simone Sibilio, PhD, Associate Professor, University of Venice Ca' Foscari, Italy
34. Prof. Fulvia Signani, Dr Psy, Adjunct Professor, University of Ferrara, Italy
35. Prof. Chiara Volpato, PhD, Professor in Social Psychology, University of Milan Bicocca (retired), Italy
36. Prof. Maria Kett, PhD, Professor of Humanitarianism and Social Inclusion, University College London Institute of Epidemiology and Health Care, Director of the Centre for Humanitarianism and Social Inclusion, University College London, United Kingdom
37. Prof. Alberto Lanzavecchia, PhD, Associate Professor in Economics, Human Rights Centre, University of Padova, Italy
38. Prof. Alexis Benos, MD, PhD, Emeritus Prof in Hygiene, Social Medicine & Primary Health Care, Laboratory of Primary Health Care and Health Services Research, Medical Dept, Aristotle University of Thessaloniki, Greece
39. Prof. Elias Kondilis, MD, DrPH, PhD, Associate Professor of Primary Health Care - Health Policy & Laboratory of Primary Health Care, General Medicine and Health Services Research, School of Medicine, Aristotle University of Thessaloniki
40. Prof. Anne Kouvonen, PhD, University of Helsinki, Finland & Queen's University Belfast, United Kingdom
41. Prof. Niels Buus, PhD, Department of Public Health, Aarhus University, Denmark
42. Prof. Stefano Scarcella Prandstraller, PhD, Associate Professor, Political Sciences, "Sapienza" University of Rome, Italy
43. Prof. Natalie Stake-Doucet, RN, PhD, Professor of Nursing, Université du Quebec, Canada
44. Prof. Ashraf Kagee, PhD, Professor: Department of Psychology Stellenbosch University, South Africa
45. Dr. Aly Bailey, PhD, Assistant Professor, University of Waterloo, Canada
46. Dr. Meredith Bessey, PhD, RD, Assistant Professor, Mount Saint Vincent University, Canada
47. Prof. Carla Rice, PhD, Professor, Canada Research Chair in Feminist Studies and Social Practice College of Social & Applied Human Sciences University of Guelph, Ontario, Canada
48. Prof. Wendy Gifford, PhD, RN, Professor, Faculty of Health Sciences, School of Nursing, University of Ottawa, Canada
49. Prof. Stefano Polizzi, PhD, Professor, Ca' Foscari University of Venice, Italy
50. Prof. Francesca Forno, PhD, Associate Professor, University of Trento, Italy
51. Dr. Carmen Cervone, PhD, Research Fellow in Psychology, University of Padova, Italy
52. Dr. Edoardo Zulato, PhD, LSE Fellow; London School of Economics and Political Science, London
53. Dr. Patrizio Tressoldi, PhD, Researcher, University of Padova (retired), Italy
54. Prof. Larkin Lamarche, PhD, Assistant Professor, York University, Canada
55. Dr. Mathilde Perray, PhD, Researcher at Université Lumière Lyon 2, France
56. Prof. Francesco Gonella, PhD, Professor of Physics, Department of Molecular Sciences and Nanosystems, Ca' Foscari University of Venice, Venezia, Italy, Director - Centre for the Study of the Systemic Dynamics of Complex Diseases, Centre for Environmental Humanities (NICHE)
57. Dr. Alessandro Ferretti, PhD, Researcher, Department of Physics, University of Torino, Italy
58. Dr. Chiara Di Girolamo, PhD MD, Assistant Professor, Department of Clinical and Biological Sciences, University of Turin, Italy
59. Dr. Giulia Silvestrini, MD, Head, Department Unit for Disease and Risk Factor Surveillance Department of Public Health, Romagna, Italy
60. Prof. Claire Carter, PhD, Professor, Gender, Religion, and Critical Studies Department, University of Regina, Canada
61. Dr. Salman A. Safir, MA, BA, PhD Student, Counseling Psychology, University of Illinois Urbana Champaign, US
62. Dr. Georgina Forshall, PhD candidate, Research Fellow, Leeds Beckett University
63. Dr. Hans Eickhoff, MD, PhD, Faculty of Social Sciences and Humanities, NOVA University Lisbon, Portugal
64. Prof. Guido Veronese, PhD, Associate Professor, University of Milano-Bicocca, Italy
65. Dr. Franco Nanni, Dr Psy, Psychologist, Bologna, Italy
66. Dr. Rose Barboza, PhD, Researcher and Professor at University of Brasilia, Brazil, University of Coimbra, Portugal

67. Dr. Alice Fabbri, PhD, Lecturer, Department of Health, University of Bath, United Kingdom
68. Dr. Shivani Kaul, PhD, Lecturer, University of Amsterdam, Netherlands
69. Dr. Sergio Cattani, Pharm MD, Pharmacist, Trento, Italy
70. Dr. Gaetano Salina, PhD, Researcher, University of Rome, Tor Vergata, Italy
71. Dr. Gaia Giuliani, PhD, Senior Researcher in Postcolonial Studies and Critical Race and Whiteness Studies, Centre for Social Studies, University of Coimbra, Portugal
72. Dr. Alessandra De Palma, MD, Director of Legal Medicine and Integrated Risk Management Unit, and Vice-President Bissoni Association, Bologna, Italy
73. Dr. Roberto Romizi, MD, President, Environmental Physicians Association, Italy
74. Dr. Antonella Francesca Simonetti, MD, PhD, Associate professor, Medicine Department, Universitat Autònoma de Barcelona, Spain
75. Prof. Marco Gemignani, PhD, Professor of Psychology, Universidad Loyola Andalucía, Spain
76. Prof. Virginia Braun, PhD, Professor, School of Psychology, The University of Auckland, New Zealand
77. Dr. Jean-Louis Aillon, MD and PhD, Association Frantz Fanon, University of Turin, Italy
78. Prof. Agostino Di Ciaula, MD, PhD, Professor of Internal Medicine, University of Bari Medical School, Italy
79. Dr. Maria João Horta Parreira, MS Science Communication, Human Ecology, PhD candidate, Faculty of Social Sciences and Humanities, NOVA University Lisbon, Portugal
80. Prof. Dave Holmes, RN, PhD, FAAN, FCAN, Professor, School of Nursing, Faculty of Health Sciences, University of Ottawa, Canada
81. Prof. Amélie Perron, RN, PhD, FCAN, Professor, School of Nursing, Faculty of Health Sciences, University of Ottawa, Canada
82. Dr. Ornella Punzo, MD PhD, Senior Researcher, Istituto Superiore di Sanità, Italy
83. Prof. Guido Giarelli, PhD, Professor of Sociology, University of Catanzaro, Italy
84. Prof. Fiona Jager, RN, PhD, Professor of Nursing, St. Lawrence College, Ontario Canada
85. Dr. Carla Pagano, University of Napoli Orientale, Italy
86. Dr. Larissa Malty, PhD, Researcher, Network for Environmental Studies of Portuguese-Speaking Countries, Faculty of Social and Human, & Faculty of Medicine, University of Lisbon
87. Prof. Paola Degani, PhD, Professor in Political Science, Law and International Studies, University of Padova, Italy
88. Dr. Carlo Romagnoli, MD, Specialist in Hygiene, Epidemiology and Public Health & President, Environmental Physicians Association, Italy
89. Dr. Federico Semeraro, MD, FERC, Consultant in Anaesthesia and Intensive Care, Department of Anaesthesia, Intensive Care and EMS, Azienda USL di Bologna, Bologna, Italy
90. Dr. Alessandro Rovetta, Editor in Chief, JMIR Publications, Italy
91. Dr. Arianna Rotulo, PhD, Assistant Professor, Health Policy and Health Systems Research, University of Groningen, The Netherlands
92. Prof. Thomas Foth, RN, MA(Ed), PhD, Associate Professor, University of Ottawa, Canada
93. Dr. Miriam Meissner, PhD, Assistant Professor, Faculty of Arts and Social Sciences, Maastricht University, The Netherlands
94. Prof. Maria Grazia Petronio, MD, Professor of Epidemiology and Public Health, University of Florence and Pisa, Italy
95. Prof. Alessandra Sannella, PhD, Associate Professor in Sociology, University of Cassino, Italy
96. Dr. Riccardo Bosi, MD, Pediatrician and Contract lecturer in Pediatrics and Neonatology, University La Sapienza, Rome, Italy
97. Prof. Annibale Biggeri, PhD, Hon. Professor of Medical Statistics, University of Padova, Italy
98. Dr. Amedeo Bianchi, MD, Director Neurology Unit, Hospital of Arezzo, Arezzo, Italy
99. Prof. Franca Ruggieri, PhD, Emeritus Professor, University of Rome, Roma Tre, Italy
100. Dr. Giovanni Ghirga, Paediatrician, MD, Scientific Committee Member of ISDE Italy (International Society of Doctors for the Environment), Basel, Switzerland
101. Dr. Fiorella Bulgogi, MD, Emerita Scientific Director of the Ramazzini Institute, Bologna, Italy, and Member of the Scientific Committee of ISDE, Italy
102. Dr. Mario Carmelo Cirillo, Former Head Department for Environmental Evaluation, Control and Sustainability at ISPRA (Italian Institute for Environmental Protection and Research), Italy
103. Dr. Ferdinando Laghi, MD, Physician, Internal Medicine and Hematologist, Vice President ISDE Italy (International Society of Doctors for the Environment), Italy
104. Dr. Celestino Panizza, MD, Physician, International Society of Doctors for the Environment (ISDE) Italy
105. Prof. Gianni Tamino, PhD, Professor of Biology, University of Padova, Italy

106. Prof. Patrick Martin, R.N. PhD, Professor, Laval University, Canada
107. Prof. Marco Cascella, PhD, MD, Associate Professor in Anaesthesia and Pain Medicine, University of Salerno, Italy
108. Dr. Edoardo Bai, MD, Occupational Doctor & Former Director of Department of Prevention, Melegnano, Italy
109. Prof. Giuseppe Masera, MD, Professor of Paediatrics (retired), Director of Pediatric Clinic, University of Milano-Bicocca, Italy
110. Dr. Elena Giovanna Bignami, MD, Full Professor, Anaesthesiology, Critical Care and Pain Medicine Division, Department of Medicine and Surgery, University of Parma, Italy
111. Dr. Valentina Bellini, MD, Associate Professor, Anaesthesiology, Critical Care and Pain Medicine Division, Department of Medicine and Surgery, University of Parma, Italy
112. Dr. Ornella Piazza, MD, Full Professor in Anaesthesia and Pain Medicine, University of Salerno, Italy
113. Dr. Antonella Litta, MD, Physician, Rheumatologist, ISDE (International Society of Doctors for the Environment), Italy
114. Prof. Kevin Deane, PhD, Senior Lecturer in Economics and Global Health, The Open University, United Kingdom
115. Prof. Giovanni Destro Bisol, PhD, Professor of Anthropology, University of Rome La Sapienza & Editor, Journal of Anthropological Sciences, Italy
116. Prof. Michele Pavon, PhD, Senior Scientist, Mathematics, University of Padova, Italy
117. Prof. Giovanna Montella, PhD, Professor of Law, University of Rome La Sapienza, Italy
118. Prof. Pier-Luc Turcotte, PhD, Assistant professor, University of Ottawa, Canada
119. Prof. Ted Schrecker, PhD, Emeritus Professor of Global Health Policy, Population Health Sciences Institute, Faculty of Medical Sciences, Newcastle University, Newcastle upon Tyne, United Kingdom
120. Prof. Sergio Pascolo, PhD, Istituto Universitario di Architettura di Venezia (IUAV), University of Venice Ca' Foscari, Italy
121. Prof. Eduardo Navarrete, PhD, Associate Professor, Department of Developmental Psychology and Socialization, University of Padova, Italy
122. Prof. Michela Lenzi, PhD, Associate Professor, Department of Developmental Psychology and Socialization, University of Padova, Italy
123. Dr. Filippo Bianchetti, MD, General Practitioner, Retired, Sanitari per Gaza
124. Dr. Anthony Infantino, MD, National Health System
125. Dr. Clara Habte, PhD, Journalist
126. Dr. Martina Alberani, MD, MPH, University of Bologna
127. Prof. Diego Giannone, Prof., University of Campania "L. Vanvitelli"
128. Dr. Paolo Cianconi, MD, PhD, Director Beck Institute, Rome, Italy
129. Prof. Antonio Maturo, Professor, Università di Bologna
130. Dr. Valeria Cesaroni, PhD student, University of Perugia
131. Dr. Anna Tabanelli, Dr Psy, Italian Psychoanalytic Society
132. Dr. Stanislao Loria, MD, Dipartimento Sanità Pubblica - Università Federico II
133. Dr. Francesco Ricciardi, PhD, IRCCS Casa Sollievo della Sofferenza - Executive Engineer
134. Dr. Andrea Koenig, Dr., Psychiatrist
135. Dr. Russell Craig Martin, DC, Associazione Italiani Chiropratici
136. Dr. Michela Massoud, MD, Pediatrician
137. Monica Zoccatelli, Healthcare OSS
138. Prof. Emanuela Girei, PhD, Liverpool John Moore's University, Reader in Management
139. Dr. Lorenzo Guglielmetti, MD, PhD, IRCCS Sacro Cuore, Negrar (VR); Medical Doctor & Researcher
140. Dr. Mariaclaudia Cusumano, PhD, Università di Milano Bicocca
141. Prof. Elisa Di Giorgio, PhD, Associate Professor, Department of Developmental Psychology and Socialization, University of Padova
142. Prof. Francesca Helm, PhD, Associate Professor, University of Padova
143. Prof. Mariagrazia Monaci, PhD, Professor and former Rector, University of Valle d'Aosta
144. Dr. Serena Granziera, MD, Venice Hospital
145. Prof. Alfredo Alietti, PhD, University of Ferrara Associate Professor
146. Dr. Mónica García Jiménez, PhD, Universidad Nacional Autónoma de México
147. Prof. Valentina Carfora, Prof., Catholic University of the Sacred Heart
148. Dr. Marta Macaluso, Research fellow, University of Bologna
149. Dr. Amalia Mineo, Psychologist, University Padova Italy
150. Dr. Fiorella Gazzetta, MD, MMG
151. Dr. Mauro Zaffaroni, MD, Società Italiana di Neurologia

152. Prof. Margherita Guidetti, PhD, Associate Professor in Social Psychology, University of Modena and Reggio Emilia
153. Dr. Giulia Scaglioni, PhD, University of Modena and Reggio Emilia, Fellow researcher
154. Patrizia Congiu, Nurse, Ospedale universitario
155. Dr. Alda Colleoni, Dr, Logopedista e Psicologa
156. Dr. Mirella Vivoli Vega, PhD, University of Sussex, Research Fellow
157. Dr. Andrea Scatolon, Dr., Research Fellow in Psychology, University of Padova, Italy
158. Dr. Davide Naddeo, Research fellow, Department of Developmental Psychology and Socialization, University of Padova, Italy
159. Dr. Sabrina Lenzi, PhD, University of Bologna
160. Prof. Nicola Ruberto, Presidente CdI, Liceo Aristofane Roma
161. Dr. Franco Padella, MSC in Chemistry, ENEA, Senior Researcher (retired)
162. Dr. Alessandro Belpiede, MD, IRCCS Istituto Nazionale Tumori "Fondazione G. Pascale" - Napoli, Italy
163. Prof. Gian Guido Balandi, Prof., University of Ferrara Italy
164. Prof. Patrizia Zanelli, Prof. Contact professor of Arabic language and literature, Ca' Foscari University of Venice
165. Dr. Danilo Mario Molla, MD, Medico pensionato
166. Dr. Giuseppe Nano, PhD, Bioascent / Senior Scientist
167. Dr. Anna Maria Carillo, MD, University of Naples Federico II
168. Dr. Sandro Zorzi, MD, Ospedale San Giovanni e Paolo
169. Dr. Valeria Cioni, MD, Ordine dei medici di Roma
170. Dr. Salvatore Pisani, Dr., Past Epidemiologist in University of Insubria
171. Prof. Silvia Galdi, PhD, Prof università della campania luigi vanvitelli
172. Dr. Kaarina Kilpiö, D.Soc.Sc., University Lecturer, University of the Arts Helsinki, Sibelius Academy, Finland
173. Dr. Stefano Tortorici, PhD candidate, Scuola Normale Superiore
174. Dr. Vukašin Gligorić, Dr., NYU Abu Dhabi
175. Dr. Antonella Di Felice, Mrs, Laurea
176. Dr. Romeo Riundi, MD, medico di famiglia in pensione
177. Dr. Mauro Bandera, MD, Fondazione Menotti Bassani
178. Prof. Ossi Rahkonen, Emeritus Professor in Medical Sociology, University of Helsinki
179. Prof. Silvia Savazzi, PhD, Full Professor, University of Verona, Italy
180. Dr. Ester Castagnaro, PhD candidate, University of Perugia/Department of Medicine and Surgery/PhD candidate
181. Dr. Vincenzo Romano, PhD, Erasmus Medical Center Rotterdam/ Assistant Professor
182. Dr. Stella Lanni, PhD, Evotec Verona
183. Dr. Matteo Antonini, PhD, HES-SO University of Applied Sciences and Arts of Western Switzerland / scientific collaborator
184. Dr. Edoardo Moretto, PhD, CNR, Institute of Neuroscience
185. Prof. Paolo Tripodi, Prof., CEO S. P. In
186. Dr. Maria Grazia Bocci, MD, National Institute for Infectious Diseases L. Spallanzani IRCCS Rome - Head of Unit of Anesthesiology and Intensive Care for the infectious diseases
187. Dr. Stefania Ianniello, MD, INMI SPALLANZANI IRCCS ROME ITALY
188. Dr. Giuseppe Brisinda, MD, Fondazione Policlinico A Gemelli IRCCS, Rome/Surgeon
189. Dr. Giulia Mineo, MD, Arnas Civico Palermo
190. Dr. Davide Mazzon, MD, Director of Anaesthesia and Intensive Care Belluno Hospital in retirement; Consulta di Bioetica Onlus
191. Dr. Francesco Ferraro, PhD, Stazione Zoologica Anton Dohrn - researcher
192. Dr. Davide Colombo, MD, PhD, Università del Piemonte Orientale
193. Dr. Giuseppe Nardi, MD, Vezo Hospital, Andavadoaka, Madagascar
194. Prof. Christian Napoli, Prof, Sapienza University of Rome
195. Prof. Claudia Mattalucci, Prof., University of Milan Bicocca
196. Dr. Anna Malfatto, MD, UO Anestesia e Rianimazione, IRCCS Bellaria (Bologna)
197. Dr. Davide Saporito, MD, AUSL ROMAGNA
198. Dr. Carlo Coniglio, MD, Emergency Department, Ospedale Maggiore Bologna Italy
199. Andrea Paggioro, Nurse, Azienda ULSS 5
200. Dr. Luca Ronci, MD, Rimini hospital, Romagna, Italy
201. Dr. Alessandra Bellan, PhD, Università di Padova



202. Prof. Massimo Antonelli, MD, Catholic University of the Sacred Heart- Fondazione Policlinico Universitario A. Gemelli IRCCS
203. Dr. Wajih Salameh, MD, oncology, Emergenza 118
204. Prof. Luigi Tritapepe, MD, Sapienza Università di Roma
205. Dr. Imad Darwish, MD, Cliniche Gavazzeni di Bergamo (Italy) - Anestesista
206. Dr. Francesca Leonardis, MD, Tor Vergata University
207. Dr. Giulia Mazzola, MD, ARNAS Civico
208. Dr. Simona Lugari, MD, San Camillo Forlanini Hospital in Rome
209. Dr. Silvia Rogante, MD, San Camillo Hospital Rome. ITALY
210. Prof. Gianluca Russo, MD, Director of Anesthesia and Intensive Care at ASST Lodi
211. Prof. Luigi Pais dei Mori, Professore a contratto, Università di Verona
212. Dr. Mario Mastrolonardo, MD, Dpt of Medical and Surgical Sciences, University of Foggia
213. Dr. Pompeo Costantino Kouroupis, MD, La Sapienza Università di Roma
214. Dr. Livia Lo Monaco, MD, Dirigente medico anestesia e rianimazione ARNAS CIVICO
215. Dr. Marco Sacchi, MD, AREU LOMBARDIA
216. Dr. Lidia Baiamonte, PhD, ENEA
217. Dr. Paolo Belardinelli, PhD, University of Trento
218. Dr. Raffaele Aspide, MD, IRCCS Istituto delle Scienze Neurologiche di Bologna
219. Dr. Farahnaz Pour Morad Kohan, MD, anestesista e rianimazione, Anestesista ospedale Rizzoli Bologna
220. Dr. Fabio Gentili, MD, Asl Bologna
221. Dr. Kasim Abd Al Hamid, MD, AUSL FERRARA
222. Dr. Monica de Simone, PhD, Consiglio Nazionale delle Ricerche
223. Dr. Paolo Marin, MD, San Paolo hospital
224. Dr. Alessio Marra, Dr, Emergency Dept, ASST Papa Giovanni XXIII, Bergamo, Italy
225. Dr. Alessandra Brivio, PhD, University Milano Bicocca
226. Dr. Ambra Bertola, MD, Emergency Medicine Physician, Papa Giovanni XXIII hospital, Bergamo, Italy
227. Dr. Stefania Castelli, Infant and Adolescent Psychoanalytic Psychotherapist, Private Practice
228. Dr. Carlotta Rubino, MD, Azienda Ospedaliera San Camillo Forlanini, Roma
229. Dr. Giacomo Dell'Avanzo, MD, ASST Papa Giovanni XXIII Bergamo
230. Dr. Eleonora Malerba, PhD, Università degli studi di Bari Aldo Moro
231. Dr. Antonella Bonura, MD, Ospedale papa Giovanni Bergamo
232. Dr. Elena Bigi, MD, Director Anaesthesiology and Intensive Care Unit, Faenza Italy
233. Dr. Hifza Naz, MD, Università degli studi di Milano
234. Dr. Chiara Abbruzzese, MD, Dipartimento Area Emergenza-Urgenza SC Anestesia e Terapia Intensiva Adulti Fondazione IRCCS Cà Granda Ospedale Maggiore Policlinico - Milano, Italy
235. Dr. Ennio Fuselli, MD, A.O. San Camillo -Forlanini Roma
236. Dr. Giulia De Fazio, MD, San Camillo Forlanini, MD
237. Dr. Sarah ElMasry, PhD, Post-Doctoral Researcher, Scuola Normale Superiore and a member of the International Sociological Association
238. Dr. Sara Ammar, MD, Policlinico A. Gemelli IRCCS Rome
239. Prof. Giorgio Mariani, PhD, Retired full professor of American literature, Sapienza university of Rome
240. Dr. Simonetta Trombetta, MD, Azienda ospedaliera San Camillo Forlanini
241. Prof. Elizabeth Ettore, PhD, University of Liverpool Professor Emerita
242. Dr. Jacopo Lupi, PhD, Researcher, Consiglio Nazionale delle Ricerche
243. Dr. Annamaria Porru, PhD, Department of Developmental Psychology and Socialization, University of Padova, Italy
244. Prof. Marco Mascia, PhD, University of Padova, president Human Rights Center, Unesco Chair Human Rights, Democracy and Peace, Coordinator Italian Network Universities for Peace
245. Dr. Ilaria Camplone, MPH, Azienda USL di Bologna
246. Prof. Nicolò Antonino Patroniti, MD, Full Professor of Anesthesiology Intensive Care, University of Genova, Director of General ICU, IRCCS San Martino Hospital, Italy
247. Dr. Stefano Mariconti, MD, papa Giovanni XXIII hospital Bergamo
248. Dr. Laura Pecoraro, MD, University "La Sapienza" of Rome, Italy
249. Dr. Paola Presutti, MD, San Camillo de Lellis Hospital- Rome Italy
250. Dr. Tommaso Tonetti, MD, Alma Mater Studiorum University of Bologna
251. Dr. Daniela Musina, PhD, Scuola Normale Superiore, Italy
252. Dr. Nerea Montejo López, PhD, Scuola Normale Superiore in Florence, Italy
253. Dr. Arianna Crosta, PhD, University of Innsbruck, Researcher

254.Dr. Giulio Turrise, PhD, Italian Institute of Technology, Post Doc  
 255.Prof. Gian Vittorio Caprara, Emeritus Professor, Sapienza University  
 256.Dr. Carlo Brondi, Researcher, CNR - National Research Council - Italy  
 257.Prof. Maria Caterina Grassi, MD, Sapienza Università di Roma prof.  
 258.Prof. Marinella Paciello, PhD, Associate Professor, Uninettuno University  
 259.Prof. Giancarlo Tanucci, Prof. of Work and Organizational Psychology (retired), European University of Rome  
 260.Dr. Mario Tavola, MD, Anesthesia and Intensive Care  
 261.Prof. Paolo Valerio, Prof, Università Napoli Federico II  
 262.Dr. Emma Baumgartner, MPH, Sapienza, University of Rome  
 263.Prof. Chiara Consiglio, PhD, Associate Professor of Work and Organizational Psychology, Sapienza University of Rome  
 264.Dr. Alessandro Politi, MD, Past, Director Cardiology Dept, "Moriggia Pelascini" Hospital. Gravedona (Co)  
 265.Prof. Anna Maria Speranza, PhD, Professor of Developmental Psychopathology, Sapienza University of Rome, Italy  
 266.Dr. Alessandra Massucci, MD, Primary Health Care, São Paulo, Brasil  
 267.Dr. Maria Chiara Rimondini, MD, Ausl  
 268.Prof. Dario Bacchini, PhD, Full Professor of Developmental Psychology, Department of Humanities, University of Naples Federico II, Italy  
 269.Dr. Roberta Fabbri, MD, Anestesia e rianimazione, Palermo  
 270.Dr. Barbara Bonazzi, Medica Ginecologa, Libera Professionista  
 271.Prof. Alessandro Pagnini, Professor, University of Florence  
 272.Prof. Fabrizio Bianchi, PhD, CNR, Pisa, Italy / Prof. Senior Associate Researcher  
 273.Dr. Lucia Mirabella, MD, PhD, University of Foggia  
 274.Prof. Serena Anderlini-D'Onofrio, PhD, University of Puerto Rico, Mayaguez  
 275.Dr. Gilda Sensales, PhD, Sapienza university of Rome Associate Professor  
 276.Dr. Giovanna Caprara, PhD, UNED Spain  
 277.Dr. Federico De Leonardis, MD, Fondazione Policlinico Tor Vergata, Rome  
 278.Prof. JP Roos, PhD, University of Helsinki, Social Sciences Department, Professor emeritus Social Policy  
 279.Dr. Evelyn Aixala, MPH, University ORT Uruguay  
 280.Prof. Giorgio Piazza, PhD, Researcher, Department of Developmental Psychology and Socialization, University of Padova, Italy  
 281.Prof. Francesco Vespignani, PhD, Associate Professor, Department of Developmental Psychology and Socialization, University of Padova, Italy  
 282.Dr. Mikel Santesteban, PhD, Senior Researcher (University of the Basque Country, UPV/EHU)  
 283.Dr. Sauro Salvatorelli, MD, Socio ISDE ITALIA VDA  
 284.Prof. Lucia Sorbera, PhD, Associate Professor, The University of Sydney  
 285.Dr. Erminia Della Monica, MD, Privato  
 286.Dr. Lorenzo Gamberini, MD, AUSL Bologna  
 287.Dr. Estella Carpi, PhD, University College London  
 288.Dr. Celeste Bittoni, PhD candidate, University of Padova  
 289.Dr. Manuela Martelli, MD, International Psychoanalytical Association  
 290.Prof. Terri Mannarini, PhD, University of Salento  
 291.Prof. Marinella Astuto, MD, University of catania full professor anesthesia and intensive care  
 292.Prof. Alessandro Lo Presti, PhD, Università degli studi della Campania "Luigi Vanvitelli", Full Professor  
 293.Prof. Angelo Gavezzotti, Prof., Università di Milano (retired)  
 294.Dr. Pierpaolo De Ciantis, MD, Ausl Romagna  
 295.Prof. Sabina Di Matteo, MSc, PhD, Prof., Unicamillus University  
 296.Dr. Giovanna Di Matteo, Postdoc fellow, Gran Sasso Science Institute  
 297.Prof. Federica Timeto, Prof., Ca' Foscari, Venice, Associate Professor  
 298.Prof. Roberto De Blasi, MD, University of Rome  
 299.Prof. Ana Figueiredo, PhD, Universidad de O'Higgins, Chile; Associate Professor  
 300.Prof. Jennifer Sheehy-Skeffington, PhD, Associate Professor in Psychology, New York University Abu Dhabi; Senior Visiting Fellow, London School of Economics and Political Science  
 301.Dr. Eren Aslı Tekin, PhD Candidate, KU Leuven  
 302.Dr. Carolina Aguilera, PhD, Universidad Alberto Hurtado  
 303.Dr. Paolo Diana, MD, Pediatric Anesthesiology, Azienda Ospedale Università Padova

- 304.Dr. Sabrina Paiwand, PhD Candidate, London School of Economics and Political Science
- 305.Dr. Vittorio Lucchetta, MD, AOPD
- 306.Prof. Maja Kutlaca, Dr, Durham University, UK, Associate Professor
- 307.Dr. Carolina Quintero, MD, BPS
- 308.Dr. Manuela Badilla R., PhD, Pontificia Universidad Católica de Chile
- 309.Prof. Antonio Zuffianò, PhD, Sapienza, Associate Professor in Psychology
- 310.Dr. Massimo Rivosecchi, MD, Ospedale pediatrico bambino gesù
- 311.Prof. Ali Teymoori, Associate Professor, University of Bergen
- 312.Dr. Silvana D'Onofrio, MD, ISDE - Italia
- 313.Dr. Marco Calgaro, MD - Geriatrician, NAGA Volunteer - Italy
- 314.Dr. Fernanda Kri, PhD, Universidad de O'Higgins
- 315.Dr. Vincenzo Cordiano, MD, International Society of Doctors for Environment, President of Regional Venetian Office
- 316.Dr. Vitalia Murgia, MD, Associazione Medici per l'ambiente ISDE Italia
- 317.Dr. Giorgio Fullin, MD, AULSS 2 Marca Trevigiana, ITALY
- 318.Dr. Sara Graziadio, PhD, Graziadio Consulting, project director
- 319.Prof. Monica Gerber, Dr., Universidad Diego Portales, Chile, Full professor
- 320.Dr. Franco Camandona, MD, Galliera hospital Genoa
- 321.Prof. Pietro Deandrea, Professor, University of Torino, Italy
- 322.Dr. Susanna Maltoni, PharmD, IRCCS AOUBO, Policlinico di S. Orsola, Bologna
- 323.Dr. Paolo Regini, MD, ISDE Italia
- 324.Prof. Giovanni Galfano, PhD, Professor of General Psychology, Department of Developmental Psychology and Socialization, University of Padova, Italy
- 325.Dr. Ilaria Di Cintio, Clinical Researcher, Biologist, IRCCS AOUBO Policlinico di Sant'Orsola
- 326.Dr. Maurizio Mussoni, Mr., Università di Bologna
- 327.Prof. Bahia Hakiki, MD, PhD, Associate professor, Università di Firenze
- 328.Dr. Nicola Iaizzi, MD, Medico del lavoro
- 329.Dr. Sofia Donoso, PhD, Universidad de Chile
- 330.Prof. Sergio Salvatore, Prof., President of the Italian Association of Psychology
- 331.Dr. Antonella Roncaglione, MD, Ordine dei Medici di Venezia
- 332.Prof. Lena Lybaek, PhD, Associate professor, University of South-Eastern Norway
- 333.Prof. Rim Saab, PhD, University of Sussex, Assistant Professor
- 334.Dr. Michele Introna, MD, Anesthesiologist and Intensive Care physician, IRCCS Istituto Neurologico C.Besta, Milano
- 335.Dr. Paola Dusi, PhD, University of Verona
- 336.Prof. Mai Albzour, PhD, Assistant Professor, Department of Social and Behavioral Science, Birzeit University, Palestine.
- 337.Prof. Kaniz Kakon, MSc, Assistant Professor, IUBAT-International University of Business Agriculture and Technology
- 338.Dr. Eleni Dimou, Dr, Senior lecturer in Criminology Open University UK
- 339.Prof. Teresa Farroni, PhD, University of Padua, Professor
- 340.Dr. Giulia Bassi, PhD, Department of Developmental and Socialization Psychology, University of Padova
- 341.Dr. Marta Gaboardi, PhD, University of Padova, DPSS
- 342.Dr. Francesca Guizzo, PhD, University of Padova
- 343.Prof. Gianluca Gini, PhD, Full Professor of Developmental Psychology, Department of Developmental Psychology and Socialization, University of Padova, Italy
- 344.Dr. Alessio Porreca, PhD, Department of Developmental Psychology and Socialization, University of Padova
- 345.Prof. Maria Fernandes-Jesus, Dr, University of Sussex, United Kingdom; Assistant Professor in Psychology
- 346.Dr. Emanuele Politi, PhD, Centre for Social and Cultural Psychology, KU Leuven, Belgium
- 347.Prof. Silvia Salcuni, Prof., PhD, DPSS- Department of Developmental and Social Psychology
- 348.Prof. Caterina Suitner, PhD, University of Padova
- 349.Dr. Elena Dalla Santa, JD, Attivista Diritti Umani
- 350.Prof. Francesco Avallone, Prof. Work and Organizational Psychology, former rector, Università degli Studi di Roma Unitelma Sapienza
- 351.Dr. Özge Savaş, PhD, College of the Holy Cross
- 352.Prof. Eloisa Valenza, Full Professor, PhD, University of Padova, Italy
- 353.Dr. Roy Macharia, MA IRSS, Jindal Global University

354. Prof. Maria Cristina Paciello, Associate Professor, Ca' Foscari University of Venice
355. Dr. Elisabetta Cerutti, MD, Azienda Ospedaliero Universitaria delle Marche, Ancona, Italy, Head, Anesthesia, Transplant and Intensive Care Department
356. Dr. Caterina Cerutti, Lettrice Maeci, Università di Bonn e Università di Düsseldorf
357. Dr. Maurizio Costanza, PhD, Università La Sapienza, Roma
358. Dr. Daniele Terriaca, Doctor, Private Association
359. Prof. Gail Sahar, PhD, Professor, Wheaton College (MA)
360. Dr. Sergio Roncato, Mr, Former Padua Uni
361. Dr. Sara Costantini, MD, AOU delle Marche
362. Dr. Federica Bartolini, MD, AOU delle Marche
363. Dr. Caterina Baiocco, MD, Anesthesia and Intensive Care, Azienda Ospedaliero Universitaria delle Marche
364. Dr. Julia Chukwuma, Dr, Lecturer in Economics, The Open University
365. Dr. Anna Maria Franconi, MD, Medico Anestesista Ospedale Riuniti Ancona
366. Prof. Cristina Flesher Fominaya, Professor, Professor Aarhus University
367. Dr. Franco Ravazzolo, Sig., ANPIT Veneto Presid
368. Dr. Eleonora Gentile, PhD, Policlinico di Bari
369. Dr. Matilde Tassinari, PhD, University of Helsinki, postdoctoral researcher
370. Dr. Carolina Mejia Toro, RDN, MA Human Rights and Multilevel Governance, University College of Auckland
371. Prof. Johanna Vollhardt, Ph.D., Clark University, Associate Professor
372. Dr. Miriam Carluccio, MD, International society of Doctors for Environment- ISDE Italy
373. Dr. Claudio Velati, MD, Former Director Regional Blood Centre Emilia Romagna
374. Prof. Stefania Zoia, Professor in Clinical Psychology, Department of Developmental Psychology and Socialisation, University of Padova
375. Dr. Andrea De Gasperi, MD, Comitato Etico Territoriale Lombardia I
376. Dr. Melissa Dottori, MD, Ospedali Riuniti Delle Marche
377. Prof. Mario Cusinato, PhD, Università of Padua
378. Dr. Piero De Carolis, MD, Institute of Neurological Sciences Bologna. Retired
379. Dr. Laura Petro', MD, San Martino Hospital Genoa
380. Dr. Monika Matei, MD, Emergency Department, Ancona, Italy
381. Dr. Marta Lusiardi, PhD Candidate, University of Padua
382. Dr. Marco Sala, PhD Candidate, University of Padova
383. Dr. Emad Kalagy, MD, Hospital Anesthesiologist
384. Dr. Daniele Coen, MD, Academy of Emergency Medicine and Care
385. Dr. Andrea Bellone, MD, Past Director Emergency medicine
386. Dr. Giorgio Sperandio, PhD, Università Politecnica delle Marche
387. Dr. Gabriele Farina, MD Director ER Faenza Italy, Ausl Romagna Italy
388. Dr. Elena Guffanti, MD, Santo spirito casale Monferrato
389. Dr. Maurizio Russo, MD, San Filippo Neri Hospital Rome
390. Dr. Michele Cosimo Santoro, MD, Policlinico "Gemelli" Roma
391. Dr. Federica Tordo Caprioli, MD, Emergency Doctor, AUSL Romagna
392. Dr. Beatrice Sciacca, MSc, Dublin City University, PhD student
393. Dr. Elettra Psychos, MD, Ausl Romagna Italy
394. Prof. Fabio De Iaco, MD, Emergency Department Director, Maria Vittoria Hospital, Turin, Past President of SIMEU (Italian Society of Emergency Medicine)
395. Dr. Maria Mirella Barbieri, MD, Hospital Faenza- medicine urgency
396. Dr. Roberta Marino, MD, Fondazione Emergenza Urgenza
397. Dr. Giulia Calignano, PhD, University of Padova
398. Dr. Luca Menghini, PhD, University of Padova, Italy
399. Dr. Elena Ricciardi, MD, MEU - Ospedale Sant'Eugenio, Roma
400. Dr. Irene Cara, MD, Emergency Medicine Physician, SIMEU
401. Dr. Umberto Gnudi, MD, Direttore Emergenza Territoriale 118 AST1 Pesaro Urbino
402. Dr. Federico Iuri, MD, Cardio-thoracic Department, Santa Maria Misericordia Hospital, Università degli Studi di Udine, Udine, Italy.
403. Dr. Paolo Leoncini, MD, World Friends ETS
404. Dr. Alice Grignaschi, MD, Ausl della Romagna
405. Dr. Vincenzo Mione, MD, A.O.U delle Marche, Ancona Italy.
406. Dr. Francesco Palmerini, M.D PhD, Neurologist
407. Dr. MariaChiara Sabatini, Mrs, University of Florence - Nurse

- 408.Dr. Giovanna Giglioli, Dottore Magistrale in Scienze Infermieristiche ed Ostetriche, Nurse, Professore a contratto, Università degli studi di Brescia
- 409.Dr. Domenico Martelli, Direttore dipartimento medico, Azienda sanitaria locale
- 410.Prof. Nicola Montano, MD, PhD, Professor, University of Milan, Italy
- 411.Dr. Barbara Amoroso, MD PhD, Sr Medical Director HOCT CITRE
- 412.Dr. Abdollah Baei Lashaki, PhD, Research Fellow
- 413.Dr. Marco Vergano, MD, Anesthesia and Intensive Care, Giovanni Bosco Hospital, Torino, Italy
- 414.Prof. Leonardo Alberto Sechi, MD, University of Udine
- 415.Dr. Erika Poggiali, MD, Emergency Department, Piacenza, Italy
- 416.Dr. Mirko Celii, PhD, KAUST
- 417.Prof. Angelo Vacca, MD, PhD, University of Bari Aldo Moro, Bari, Italy
- 418.Dr. Federica Franceschi, MD, Of Bologna
- 419.Dr. Angelo Coffa, MD, AUSL Romagna
- 420.Dr. Paolo Farolfi, MD, AUSL ROMAGNA
- 421.Dr. Elisabetta Amanti, MD, ausl romagna
- 422.Dr. Andrea Drei, Dr., Emergency Department, Ospedale degli Infermi, Faenza, Italy
- 423.Dr. Francesca Chiara Surace, MD, Aou Marche
- 424.Dr. Annalisa Prati, MD, Pronto Soccorso Faenza, AUSL Romagna
- 425.Prof. Giovanni Squadrito, MD, Full prof Internal medicine
- 426.Prof. Roberto Tarquini, MD PhD, Società Italiana di Medicina Interna
- 427.Dr. Laura Merletti, MD, Emergency Medicine Physician, Luigi Sacco Hospital, Milan - University Lecturer, University of Milan
- 428.Dr. Manuela Minaudo, MD, Ospedale di Chivasso-ASLTO4- Torino
- 429.Dr. Andrea Agarossi, MD, ASST Grande Ospedale Metropolitano Niguarda, Milan, Italy
- 430.Dr. Renato Cozzi, MD, Ospedale Niguarda Milano
- 431.Dr. Alessandra Ionescu, MD, Ospedale santa rosa - viterbo Italia
- 432.Dr. Carla Martella, MD, University
- 433.Dr. Anna Bulgheroni, Psych, Ordine Psicologi Lombardia
- 434.Dr. Alessandro Grembiale, MD, Azienda sanitaria Friuli Occidentale
- 435.Prof. Sara Romanò, PhD, Assistant professor, University of Turin
- 436.Dr. Tiziana Daponte, MD, Surgeon, Milan, Italy
- 437.Dr. Luciana Carraro, PhD, University of Padova
- 438.Dr. Stefano Skurzak, MD, AOU Città della Salute e della Scienza di Torino
- 439.Dr. Gabriele Baldini, MD, University of Florence
- 440.Prof. Efisio Manunta, PhD, Associate professor in social psychology, Université de Toulouse, CLLE, CNRS
- 441.Dr. Maria Sole Vallecoccia, MD, Azienda USL Toscana Centro
- 442.Prof. Jeff Kiesner, PhD, University of Padova, Associate Professor
- 443.Dr. Rita Napolitano, MD, Ordine dei medici di Torino OMCEO- Responsabile Rianimazione Ospedale Monfalcone (GO) ASUGI
- 444.Dr. Franco Magurno, PhD, University of Silesia in Katowice
- 445.Dr. Stella Ingrassia, MD, Ospedale Luigi Sacco
- 446.Dr. Nicola Binetti, MD, Bologna AUSL
- 447.Dr. Soccorsa Sofia, MD, Ospedale Maggiore Dipartimento di emergenza Bologna
- 448.Dr. Chiara Benazzi, MD, ASST Mantova
- 449.Prof. Ricardo Gómez Huelgas, MD, PhD, Professor of Universidad de Málaga,Spain. Internal Medicina Department, Hospital Regional Universitario de Málaga, Spain.
- 450.Prof. Daniele Biasucci, MD, Prof., Tor Vergata' University of Rome
- 451.Dr. Roberta Meloni, MSc, Private Practice, Rome, Italy, Licensed Psychologist and Psychotherapist
- 452.Dr. Alice Frangione, MD, Clinica di Cardiologia, Ospedali Riuniti di Ancona, Italia
- 453.Dr. Suela Kacerja, PhD, University of South-Eastern Norway
- 454.Dr. Francesca Rezzonico, MD, ASST ovest milanese, UOC Ematologia, Legnano (MI), Italy
- 455.Prof. Marco Vicenzi, MD, PhD, University of Milan
- 456.Prof. Silvia Benavides Varela, PhD, University of Padova
- 457.Dr. Marta Amorim, MD, Universidade do Algarve
- 458.Prof. Antonino Vallesi, PhD, University of Padova
- 459.Prof. Cinzia Calvio, Professor, University of Pavia
- 460.Prof. Anna Pitotti, Prof. Biochemistry retired, Udine
- 461.Dr. Maria Maddalena Bitondo, MD, Ausl romagna
- 462.Dr. Anna Farina, MD, Ospedale Sandro Pertini Roma

463. Prof. Danilo Spasiano, PhD, Polytechnic University of Bari - Associate Professor
464. Dr. Gianmarco Galuppo, M.Phil., Writer, Art Director of A.C.T. School of Creative Writing
465. Dr. Mattia Quargnolo, MD MPH, Ausl Romagna
466. Dr. Anna Fetta, MD, University of Bologna, Department of Surgical and Medical Science, researcher
467. Dr. Benedetta Beltramelli, MD, MSc, FWEM, Azienda ULSS 8 Berica, San Bortolo Hospital, Vicenza  
– Italy Consultant Anaesthesiologist and Critical Care Physician Affiliated Fellow, World Extreme Medicine (FWEM)
468. Dr. Flavia Rallo, MD, Public Health Specialist, Azienda USL Bologna - Italy
469. Dr. Maura Coveri, MD, Director of the Geriatric Department (retired) AUSL Bologna
470. Dr. Giovanni Gordini, MD, Intensive Care and Emergency Department - Maggiore Hospital - AUSL Bologna (Retired)
471. Dr. Camilla Benedetti, MD, Casa della Comunità San Giovanni in Persiceto (BO)
472. Dr. Margherita Menozzi, MD, Orthopaedic and traumatologist at ospedale Civile di Guastalla
473. Prof. Antonella Marcucci De Vincenti, PhD, Universite' Paris 13 Ancien Maitre de Conferences
474. Dr. Venerando Barbagallo, MD, Italian healthcare system
475. Dr. Elisa Amorotti, MD, Ospedale Faenza
476. Prof. Guglielmina Nadia Ranzani, Professor of Human Genetics (retired), University of Pavia - Italy
477. Dr. Roberto Vaccari, MD, Child Neurology and Psychiatry, Milan (Italy)
478. Dr. Francesca Cervi, MD, PhD, Azienda Unità Sanitaria Locale Bologna, Italy
479. Dr. Guilherme Carvalho, MD, University of São Paulo
480. Dr. Gabriele Traviglia, MD, Hôpital Saint Anne Saint Rémi
481. Dr. Francesco Sinatora, PhD, Università degli studi di Padova
482. Prof. Evangelos Ntontis, PhD, The Open University, Senior Lecturer
483. Dr. Maria Vinci, MD, Bambino Gesù Children's Hospital
484. Michelle Marji, PhD Candidate, University of Wisconsin-Madison
